# Supplementary material for: Enhanced biocatalytic degradation of lignin using combinations of lignin-degrading enzymes and accessory enzymes
Source: Royal Society of Chemistry journal article supplement (doi:10.1039/d1cy00431j), 2021-01-01
Supplement: d1cy00431j1.pdf [file d1cy00431j1.pdf]

## Enhanced biocatalytic degradation of lignin using combinations of lignin-degrading enzymes and accessory enzymes

Goran M.M. Rashid and Timothy D.H. Bugg\*

Department of Chemistry, University of Warwick. Coventry CV4 7AL

### Supporting Information

**Figure S1.** Gene cloning and protein purification of recombinant enzymes. A. *Agrobacterium* sp. DyP. B. *Comamonas testosteroni* DyP. C *Sphingobacterium* sp. T2. dihydrolipoamide dehydrogenase (DHLDH) DHLDH1 and DHLDH2. D. *Agrobacterium* sp. LigE.

**Figure S2.** pH/rate profiles of recombinant *Agrobacterium* DyP and *Comamonas testosteroni* DyP

**Figure S3.** Reaction of  $\beta$ -aryl ether lignin model compound guaiacylglyceryl- $\beta$ -guaiacyl ether (GGE) with *Sphingobium* SYK-6 LigD and *Agrobacterium* sp. LigE, assessed by C18 reverse phase HPLC.

**Figure S4.** Reaction of *O*-benzylguaiacol (BnG) with *Agrobacterium* sp. LigE, assessed by C18 reverse phase HPLC.

**Figure S5.** Error analysis for data shown in Figure 2.

**Figure S6.** Calibration of FCA assay using vanillin as standard.

**Figure S7.** Reaction of organosolv lignin and  $\beta$ -aryl ether lignin dimer model compound with *Desulfitobacterium hafniense* arylsulfotransferase (AST)

**Figure S8.** Estimation of soluble lignin concentration by reaction with Coomassie dye G250

**Figure S9.** Increase in lignin solubility by treatment with *D. hafniense* AST

**Figures S10-S19.** New product peaks observed by reverse phase HPLC analysis of biotransformations of lignins by enzyme combinations.

**Figures S20-S33.** LC-MS data for new product peaks observed from biotransformation of lignins by enzyme combinations.

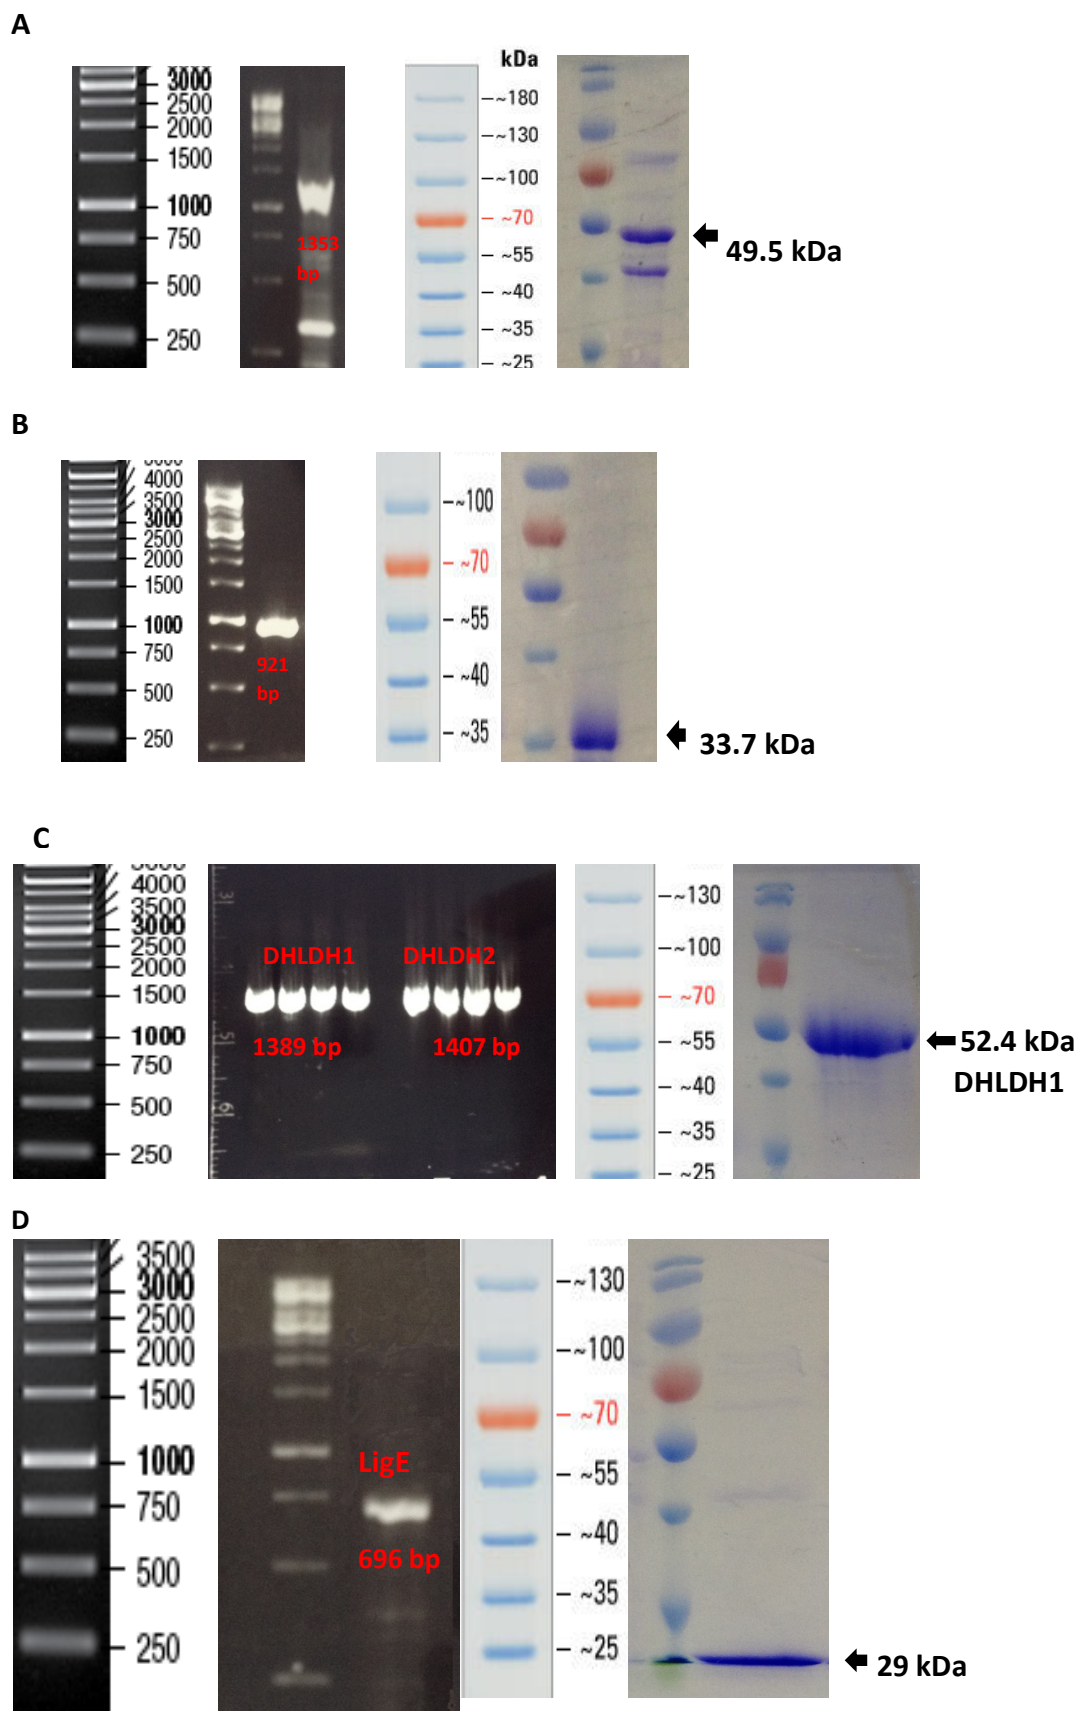

**Figure S1.** Gene cloning and protein purification of recombinant enzymes. A. *Agrobacterium* sp. DyP. B. *Comamonas testosteroni* DyP. C *Shingobacterium* sp. T2. dihydrolipoamide dehydrogenase (DHLDH) DHLDH1 and DHLDH2. D. *Agrobacterium* sp. LigE.

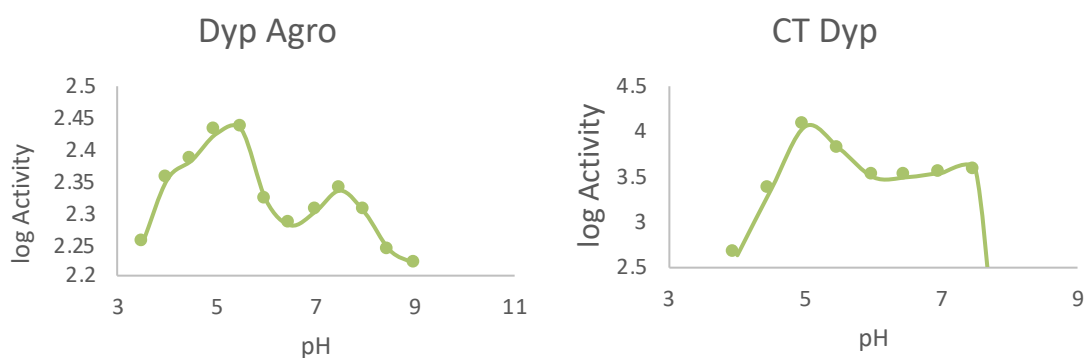

**Figure S2.** pH/rate profiles of recombinant Agro DyP and Ct DyP.

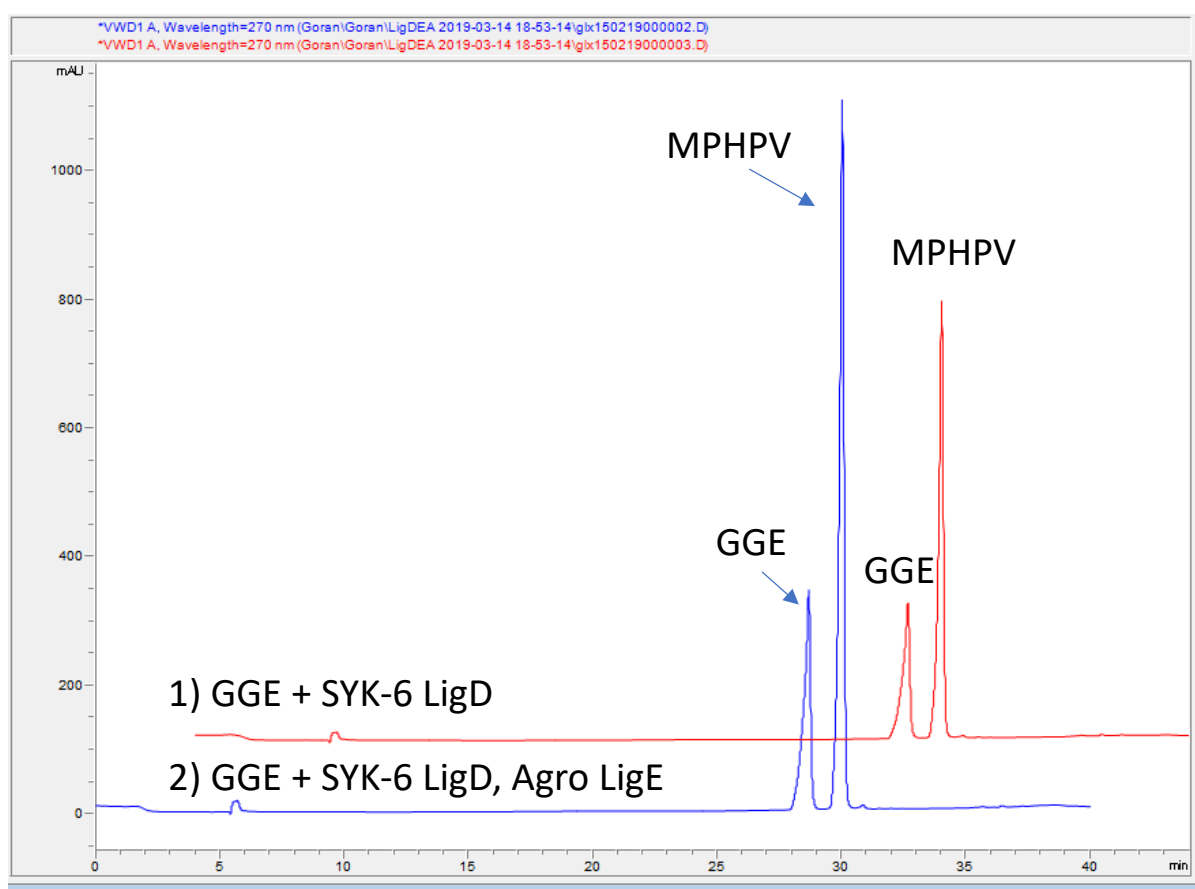

**Figure S3.** Reaction of  $\beta$ -aryl ether lignin model compound guaiacylglyceryl- $\beta$ -guaiacyl ether (GGE) with *Shingobium* SYK-6 LigD and *Agrobacterium* sp. LigE, assessed by C18 reverse phase HPLC. 1) incubation of GGE (1.0 mM) with 60  $\mu$ g *Shingobium* SYK-6 LigD and 1 mM  $\text{NAD}^+$  (red); 2) incubation of GGE (1.0 mM) with 60  $\mu$ g *Shingobium* SYK-6 LigD and 100  $\mu$ g *Agrobacterium* LigE in the presence of 1.0 mM  $\text{NAD}^+$  and 1.0 mM glutathione (blue). The reactions were incubated for 16 hr at 30°C in 50 mM Tris-HCl buffer pH 8.0 containing 150 mM NaCl. MPHPV,  $\alpha$ -(2-methoxyphenoxy)- $\beta$ -hydroxypropiovanillone.

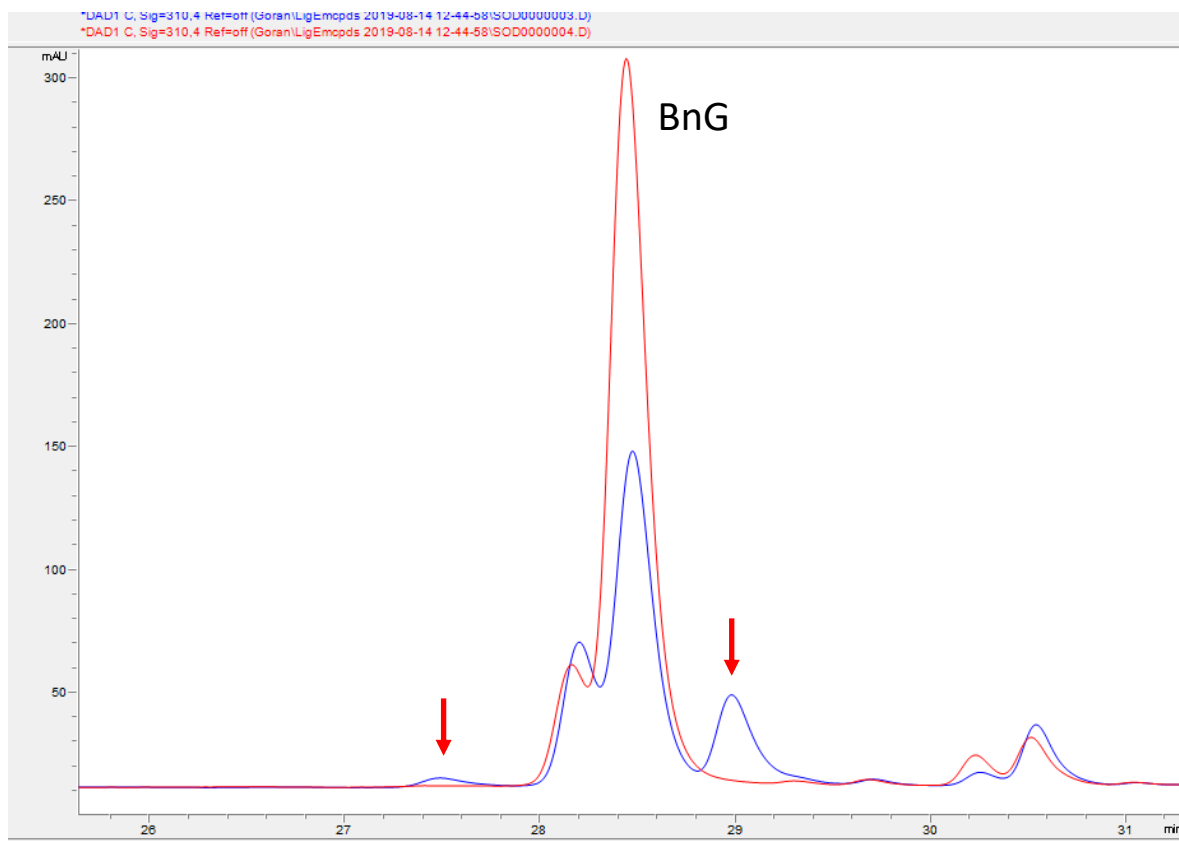

**Figure S4.** Reaction of *O*-benzylguaiacol (BnG) with *Agrobacterium* sp. LigE, assessed by C18 reverse phase HPLC. 1) Control sample of 100  $\mu$ M BnG with 1 mM glutathione (red); 2) incubation of 100  $\mu$ M BnG with 100  $\mu$ g LigE in the presence of 1 mM glutathione (blue). Reactions were incubated at 30°C overnight in 50 mM Tris-HCl buffer pH 8.0 containing 150 mM NaCl. New peaks observed after reaction with LigE are marked with arrows.

| FCA HL 1 hr     | AV Humin |   |       | FCA hr          | GVPL  |   |       | FCA 1 hr        | AVL   |   |       |
|-----------------|----------|---|-------|-----------------|-------|---|-------|-----------------|-------|---|-------|
|                 | A        | N | CV    |                 | A     | N | CV    |                 | A     | N | CV    |
| A. DyP +DHLDH1  | 0.203    | 4 | 2.75% | A. DyP +DHLDH1  | 0.654 | 4 | 3.33% | A. DyP +DHLDH1  | 0.384 | 4 | 1.64% |
| Ct. DyP +DHLDH1 | 0.277    | 4 | 2.75% | Ct. DyP +DHLDH1 | 0.703 | 4 | 3.33% | Ct. DyP +DHLDH1 | 0.363 | 4 | 1.64% |
| DyP 1B +DHLDH1  | 0.272    | 4 | 4.61% | DyP 1B +DHLDH1  | 0.58  | 4 | 2.85% | DyP 1B +DHLDH1  | 0.306 | 4 | 5.44% |
| SOD1 +DHLDH1    | 0.257    | 4 | 3.61% | SOD1 +DHLDH1    | 0.391 | 4 | 2.85% | SOD1 +DHLDH1    | 0.305 | 4 | 5.44% |
| CopA            | 0.162    | 4 | 5.36% | CopA            | 0.348 | 4 | 2.44% | CopA            | 0.28  | 4 | 3.36% |
| O.CueO          | 0.172    | 4 | 5.36% | O.CueO          | 0.28  | 4 | 2.44% | O.CueO          | 0.342 | 4 | 3.36% |
| DHLDH1          | 0.104    | 4 | 4.16% | DHLDH1          | 0.287 | 4 | 1.71% | DHLDH2          | 0.244 | 4 | 0.93% |
| no Enz          | 0.178    | 4 | 3.16% | GV01            | 0.185 | 4 | 1.71% |                 |       |   |       |
| A. DyP +DHLDH2  | 0.271    | 4 | 2.10% | A. DyP +DHLDH2  | 0.894 | 4 | 5.28% | A. DyP +DHLDH2  | 0.518 | 4 | 0.95% |
| Ct. DyP +DHLDH2 | 0.3      | 4 | 2.10% | Ct. DyP +DHLDH2 | 0.793 | 4 | 5.28% | Ct. DyP +DHLDH2 | 0.438 | 4 | 0.95% |
| DyP 1B +DHLDH2  | 0.323    | 4 | 3.11% | DyP 1B +DHLDH2  | 0.723 | 4 | 2.87% | DyP 1B +DHLDH2  | 0.417 | 4 | 2.03% |
| SOD1 +DHLDH2    | 0.341    | 4 | 3.11% | SOD1 +DHLDH2    | 0.471 | 4 | 2.87% | SOD1 +DHLDH2    | 0.39  | 4 | 2.03% |
| CopA + DHLDH2   | 0.277    | 4 | 4.71% | CopA + DHLDH2   | 0.25  | 4 | 4.54% | CopA + DHLDH2   | 0.259 | 4 | 0.31% |
| O.CueO + DHLDH2 | 0.173    | 4 | 4.71% | O.CueO + DHLDH2 | 0.265 | 4 | 4.54% | O.CueO + DHLDH2 | 0.281 | 4 | 0.31% |
| DHLDH2          | 0.63     | 4 | 4.34% | DHLDH2          | 0.445 | 4 | 1.23% | DHLDH2          | 0.231 | 4 | 1.16% |
| no Enz          | 0.178    | 4 | 3.73% |                 |       |   |       |                 |       |   |       |
| A. DyP +Prx     | 0.718    | 4 | 2.48% | A. DyP +Prx     | 0.698 | 4 | 2.81% | A. DyP +Prx     | 0.592 | 4 | 2.25% |
| Ct. DyP + Prx   | 0.664    | 4 | 2.48% | Ct. DyP + Prx   | 0.719 | 4 | 2.81% | Ct. DyP + Prx   | 0.401 | 4 | 2.25% |
| DyP 1B + Prx    | 0.801    | 4 | 3.16% | DyP 1B + Prx    | 0.488 | 4 | 1.56% | DyP 1B + Prx    | 0.467 | 4 | 3.35% |
| SOD1 + Prx      | 0.51     | 4 | 3.16% | SOD1 + Prx      | 0.377 | 4 | 1.56% | SOD1 + Prx      | 0.302 | 4 | 3.35% |
| CopA + Prx      | 0.231    | 4 | 3.42% | CopA + Prx      | 0.233 | 4 | 5.88% | CopA + Prx      | 0.219 | 4 | 2.27% |
| O.CueO + Prx    | 0.142    | 4 | 3.42% | O.CueO + Prx    | 0.308 | 4 | 5.88% | O.CueO + Prx    | 0.224 | 4 | 2.27% |
| Prx             | 0.229    | 4 | 2.47% | Prx             | 0.33  | 4 | 1.24% | Prx             | 0.246 | 4 | 2.13% |
| no Enz          | 0.178    | 4 | 2.47% |                 |       |   |       |                 |       |   |       |
| A. DyP + Lig E  | 0.667    | 4 | 2.01% | A. DyP + Lig E  | 1.123 | 4 | 3.18% | A. DyP + Lig E  | 0.874 | 4 | 1.15% |
| Ct. DyP + Lig E | 0.624    | 4 | 2.06% | Ct. DyP + Lig E | 0.988 | 4 | 3.18% | Ct. DyP + Lig E | 0.504 | 4 | 1.15% |
| DyP 1B + Lig E  | 0.732    | 4 | 2.17% | DyP 1B + Lig E  | 0.838 | 4 | 3.56% | DyP 1B + Lig E  | 0.55  | 4 | 1.38% |
| SOD1 + Lig E    | 0.387    | 4 | 2.17% | SOD1 + Lig E    | 0.342 | 4 | 3.56% | SOD1 + Lig E    | 0.329 | 4 | 1.38% |
| Lig E           | 0.266    | 4 | 5.92% | Lig E           | 1.2   | 4 | 1.45% | Lig E           | 0.741 | 4 | 0.76% |
| no Enz          |          | 4 | 2.92% |                 |       |   |       |                 |       |   |       |
| A. DyP + AST    | 0.493    | 4 | 2.43% | A. DyP + AST    | 0.791 | 4 | 1.18% | A. DyP + AST    | 0.545 | 4 | 2.20% |
| Ct. DyP + AST   | 0.435    | 4 | 2.43% | Ct. DyP + AST   | 0.761 | 4 | 1.18% | Ct. DyP + AST   | 0.409 | 4 | 2.20% |
| DyP 1B + AST    | 0.428    | 4 | 1.22% | DyP 1B + AST    | 0.706 | 4 | 1.46% | DyP 1B + AST    | 0.376 | 4 | 1.36% |
| SOD1 + AST      | 0.436    | 4 | 1.22% | SOD1 + AST      | 0.571 | 4 | 1.46% | SOD1 + AST      | 0.389 | 4 | 1.36% |
| CopA + AST      | 0.329    | 4 | 3.94% | CopA + AST      | 0.663 | 4 | 2.02% | CopA + AST      | 0.28  | 4 | 1.19% |
| O.CueO + AST    | 0.359    | 4 | 3.94% | O.CueO + AST    | 0.543 | 4 | 2.02% | O.CueO + AST    | 0.342 | 4 | 1.19% |

|         |       |   |       |        |       |   |       |         |       |   |       |
|---------|-------|---|-------|--------|-------|---|-------|---------|-------|---|-------|
| AST     | 0.318 | 4 | 2.00% | AST    | 0.682 | 4 | 1.02% | AST     | 0.218 | 4 | 2.72% |
| Control | 0.112 | 4 | 2.00% |        |       |   |       | Control | 0.227 | 4 | 2.72% |
|         |       |   |       | CopA   | 0.324 | 4 | 0.17% |         |       |   |       |
|         |       |   |       | O.Cueo | 0.255 | 4 | 0.17% | AST     | 0.263 | 4 | 0.57% |

**Figure S5.** Error analysis for data shown in Figure 2, showing mean absorbance (A), number of replicates (N) and coefficient of variation (CV). Values of CV are typically 2-3%, with a maximum of 6%.

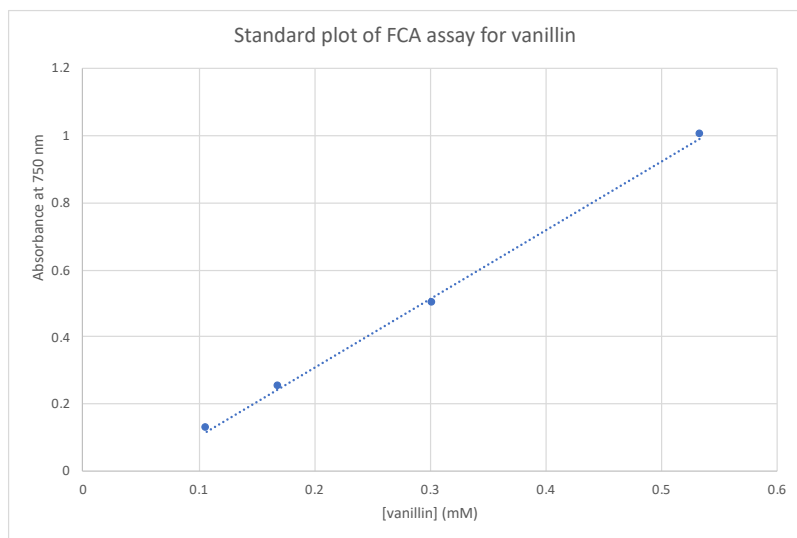

**Figure S6.** Calibration of FCA assay using vanillin as standard.

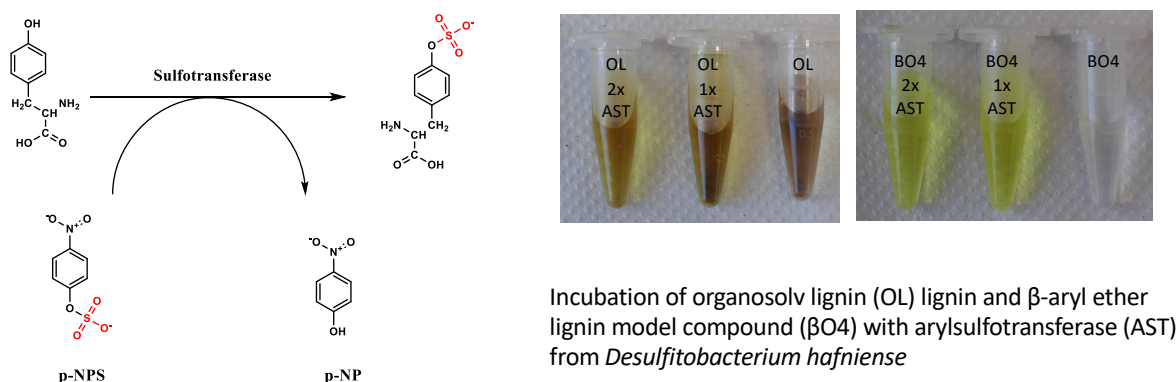

**Figure S7.** Reaction of organosolv lignin and  $\beta$ -aryl ether lignin dimer model compound with *Desulfitobacterium hafniense* arylsulfotransferase (AST), generating p-nitrophenol by-product.

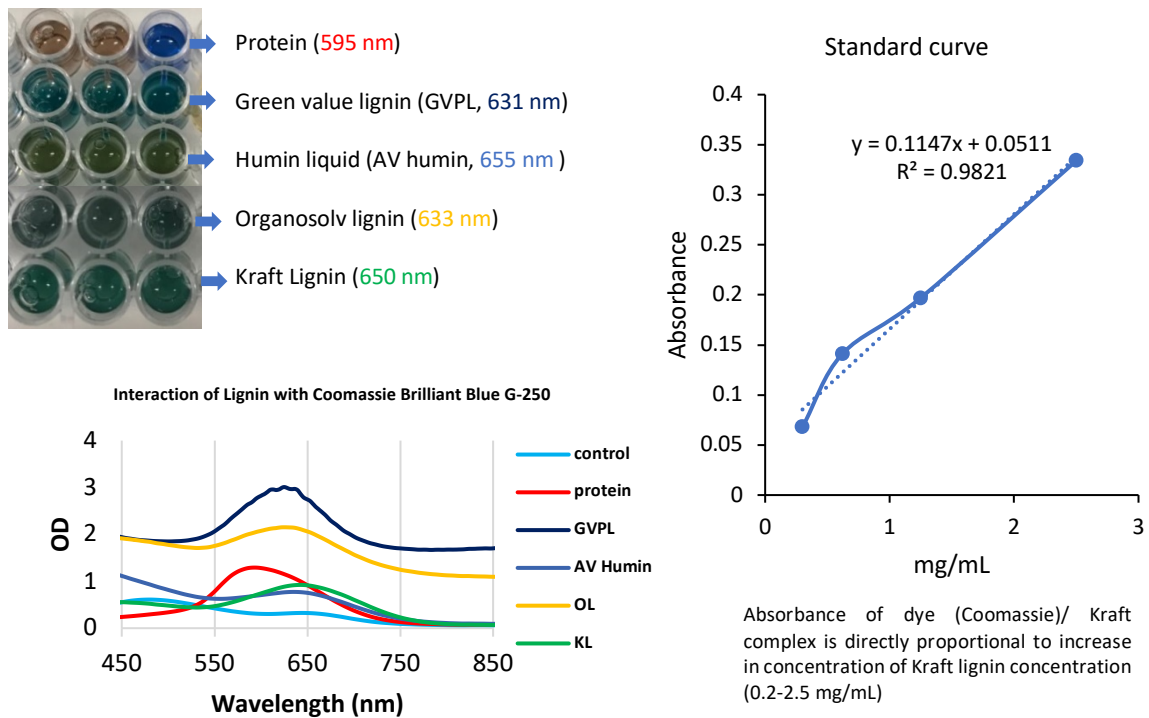

**Figure S8.** Estimation of soluble lignin concentration by reaction with Coomassie dye G250.

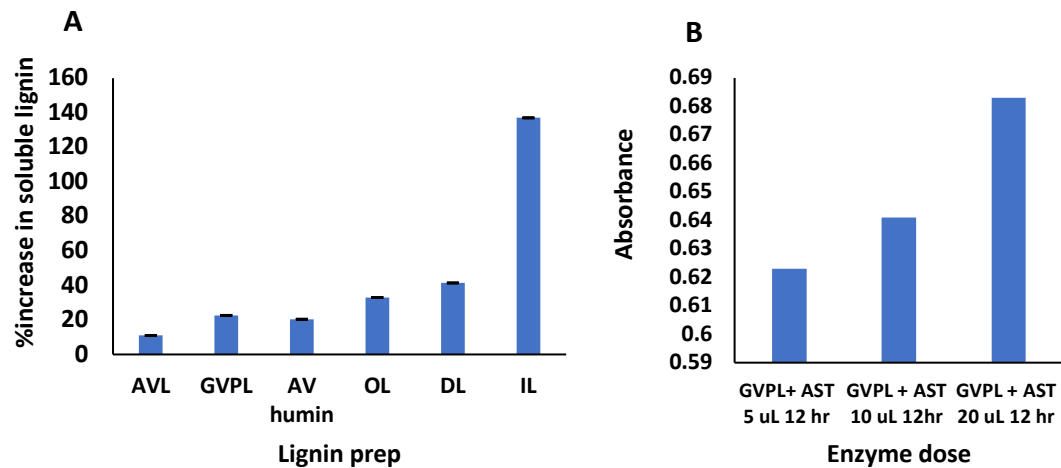

**Figure S9.** A. Percentage increase in soluble lignin by treatment with *D. hafniense* AST, estimated using Coomassie G250 dye. B. Increase in solubility of Green Value Protobind lignin correlates with dose of recombinant AST.

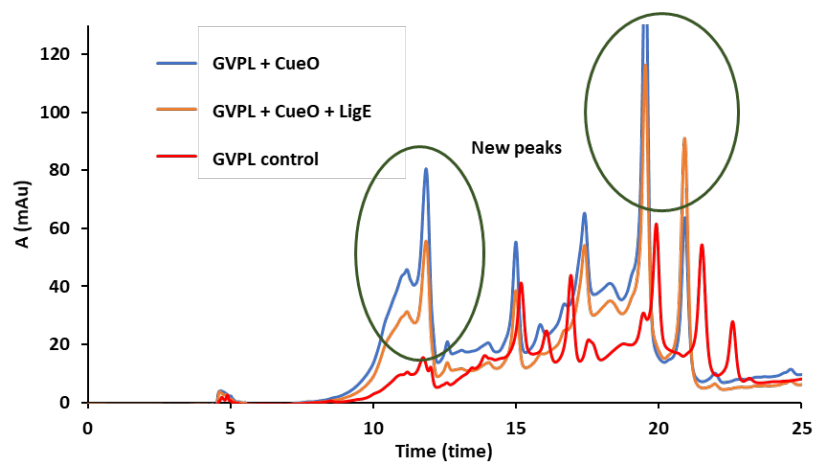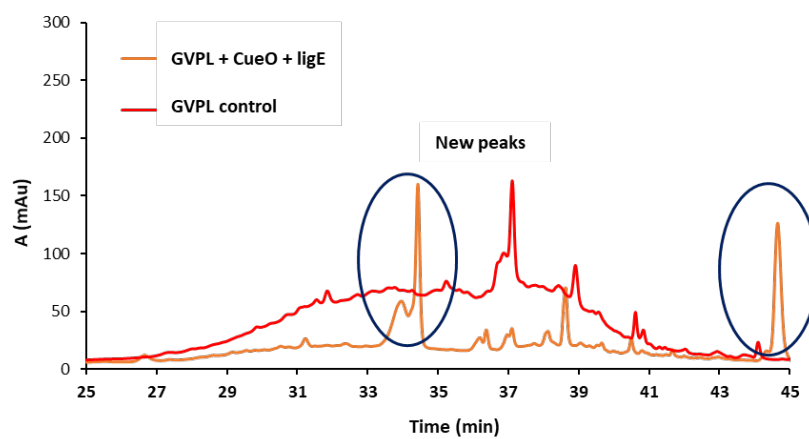

**Figure S10.** New product peaks from biotransformation of GVPL by Agro LigE in combination with CueO observed by reverse phase HPLC analysis (upper panel retention time 5-25 min, lower panel 25-45 min).



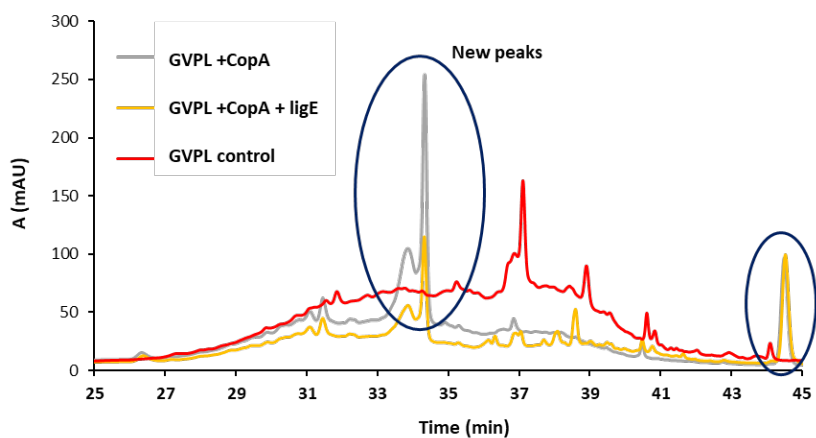

**Figure S11.** New product peaks from biotransformation of GVPL by Agro LigE in combination with CopA observed by reverse phase HPLC analysis.

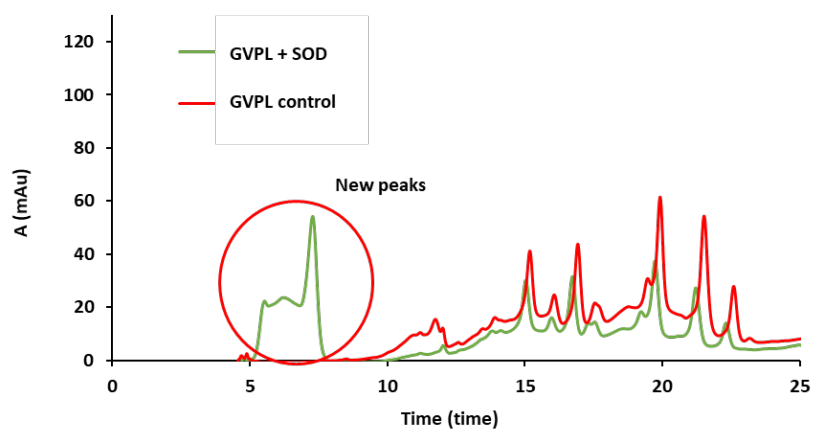

**Figure S12.** New product peaks from biotransformation of GVPL by *Sphingobacterium* MnSOD observed by reverse phase HPLC analysis.

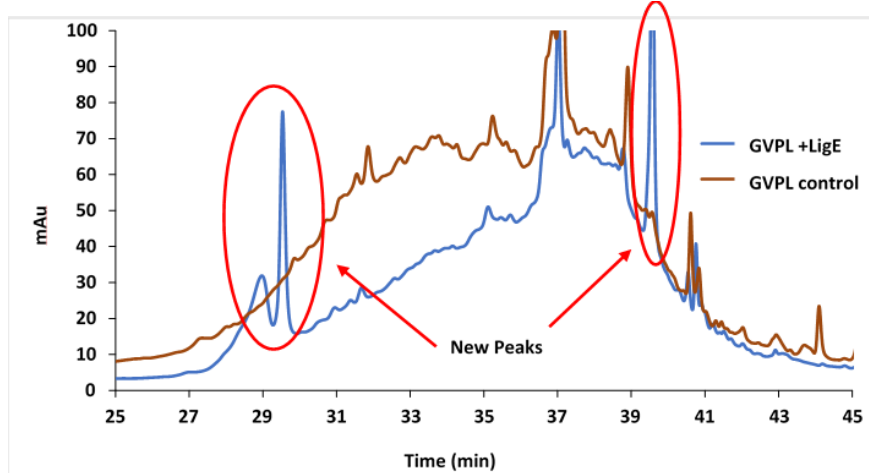

**Figure S13.** New product peaks from biotransformation of GVPL by Agro LigE observed by reverse phase HPLC analysis.

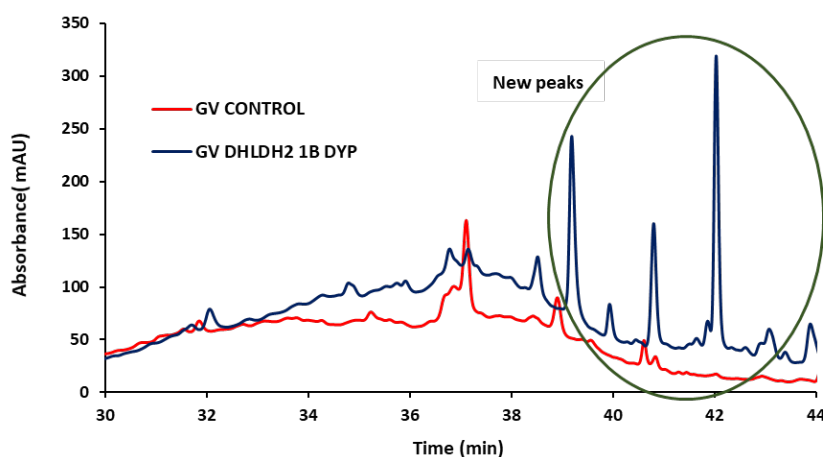

**Figure S14.** New product peaks from biotransformation of GVPL by *Sphingobacterium* DHLDH2 in combination with DyP 1B observed by reverse phase HPLC analysis.

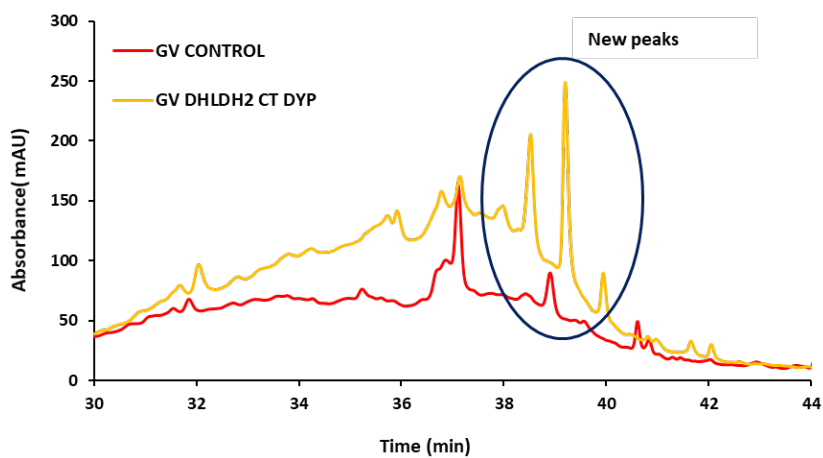

**Figure S15.** New product peaks from biotransformation of GVPL by *Sphingobacterium* DHLDH2 in combination with Ct DyP observed by reverse phase HPLC analysis

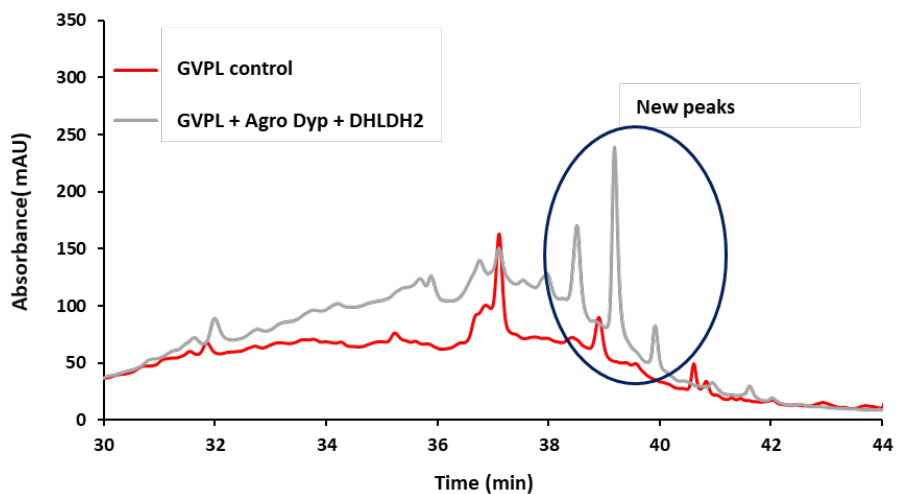

**Figure S16.** New product peaks from biotransformation of GVPL by *Sphingobacterium* DHLDH2 in combination with Agro DyP observed by reverse phase HPLC analysis.

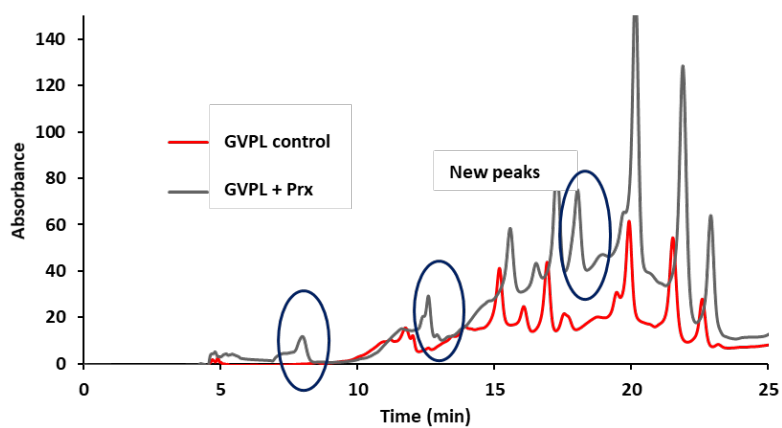

**Figure S17.** New product peaks from biotransformation of GVPL by Prx observed by reverse phase HPLC analysis.

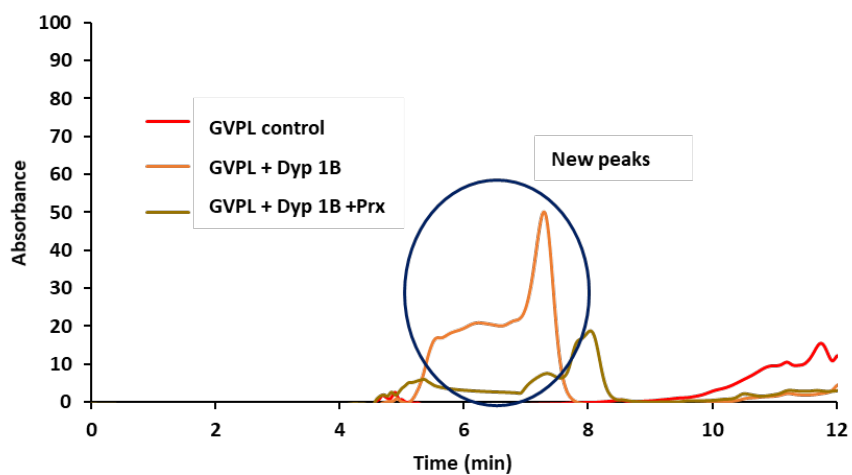

**Figure S18.** New product peaks from biotransformation of GVPL by Prx in combination with Dyp 1B observed by reverse phase HPLC analysis.

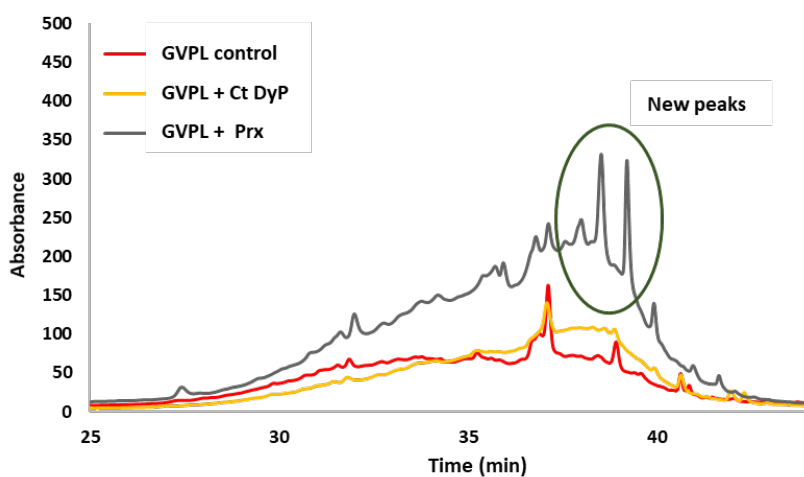

**Figure S19.** New product peaks from biotransformation of GVPL by Prx in combination with Ct DyP observed by reverse phase HPLC analysis.

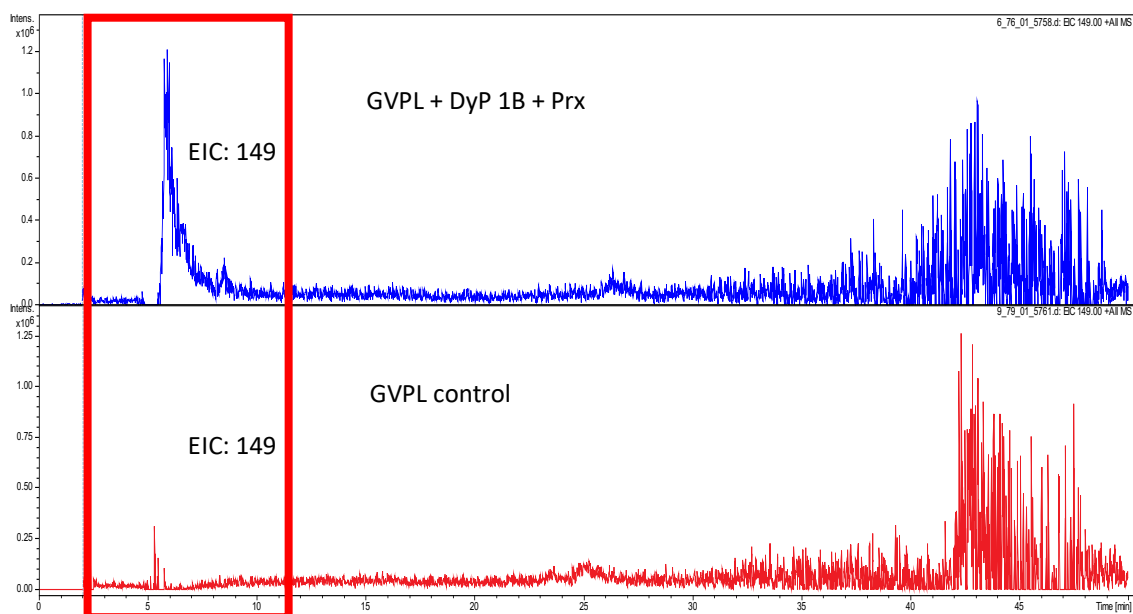

**Figure S20.** Incubation of GVPL with DyP 1B enzyme in the presence of Prx, extracted ion chromatogram for  $m/z$  149. Identified as 1-(4-hydroxyphenyl)ethanol ( $MH^+$  149) by comparison with commercial standard.

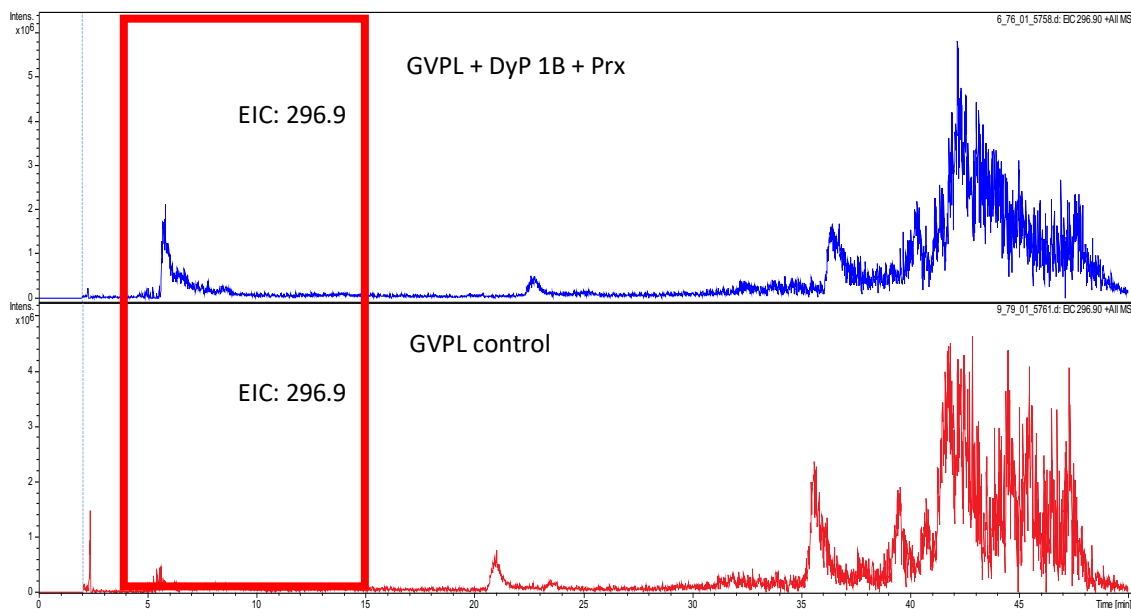

**Figure S21.** Incubation of GVPL with DyP 1B enzyme in the presence of Prx, extracted ion chromatogram for  $m/z$  296.9. Probable oxidised lignin dimer product (G,H units).

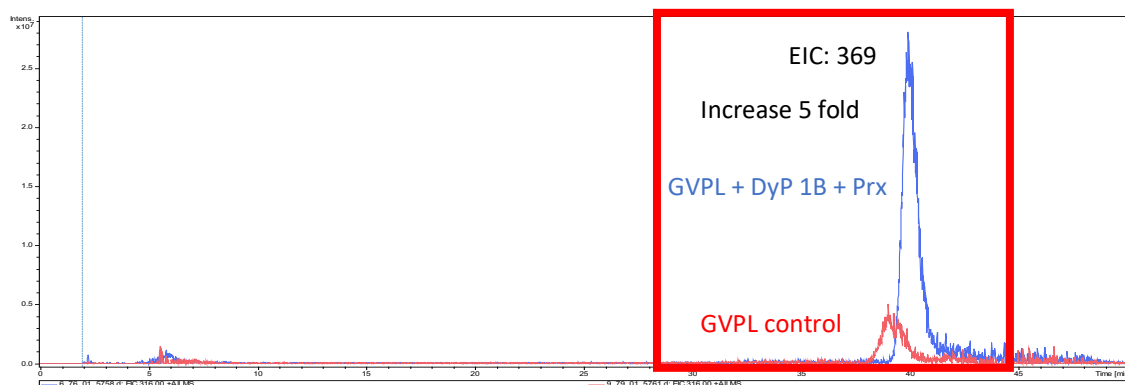

**Figure S22.** Incubation of GVPL with Dyp 1B enzyme in the presence of Prx, extracted ion chromatogram for  $m/z$  369. Probable oxidised lignin dimer product (S,G units).

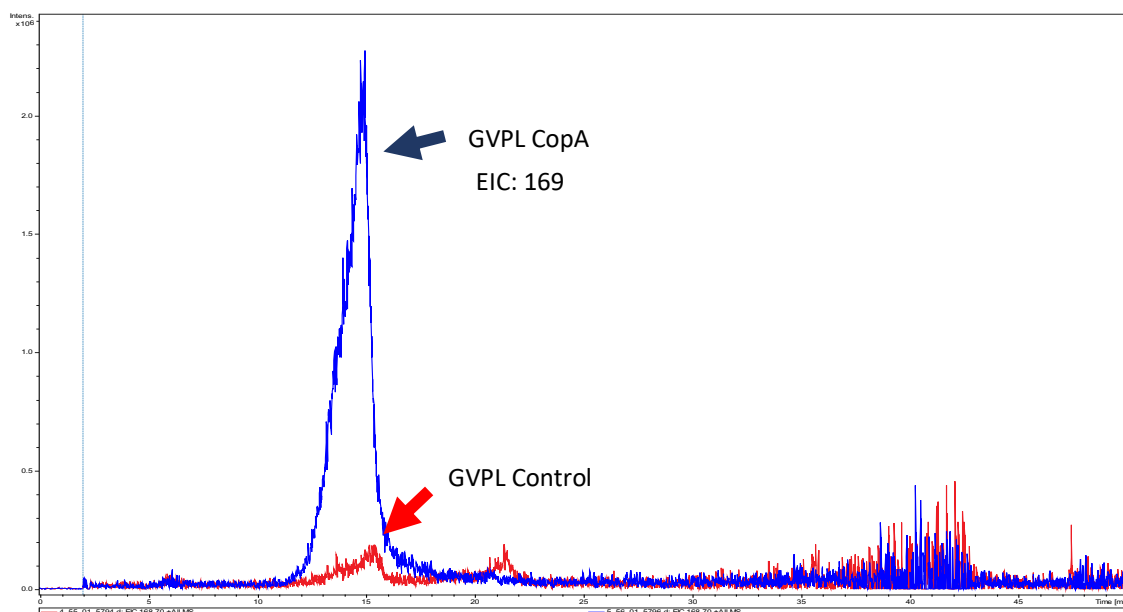

**Figure S23.** Incubation of GVPL with CopA enzyme, extracted ion chromatogram for  $m/z$  169. Identified as vanillic acid ( $MH^+$  169) by comparison with commercial standard.

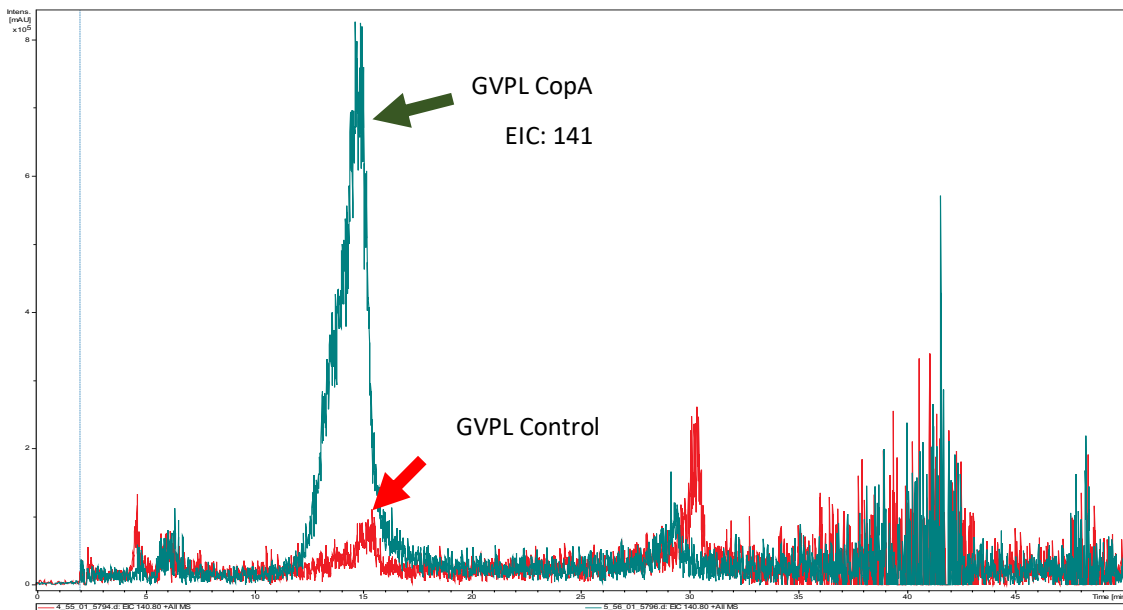

**Figure S24.** Incubation of GVPL with CopA enzyme, extracted ion chromatogram for  $m/z$  141. Identified as methoxy-1,4-quinone ( $MH^+$  141) by comparison with commercial standard.

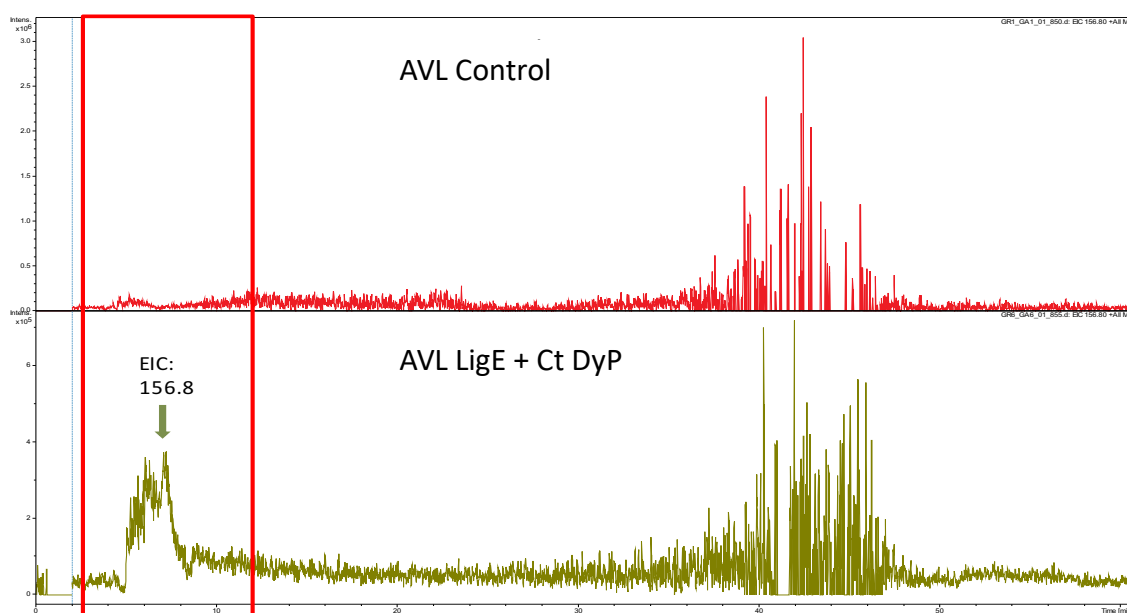

**Figure S25.** Incubation of AVL with CtDyp enzyme in the presence of LigE, extracted ion chromatogram for  $m/z$  156.8. Structure not identified.

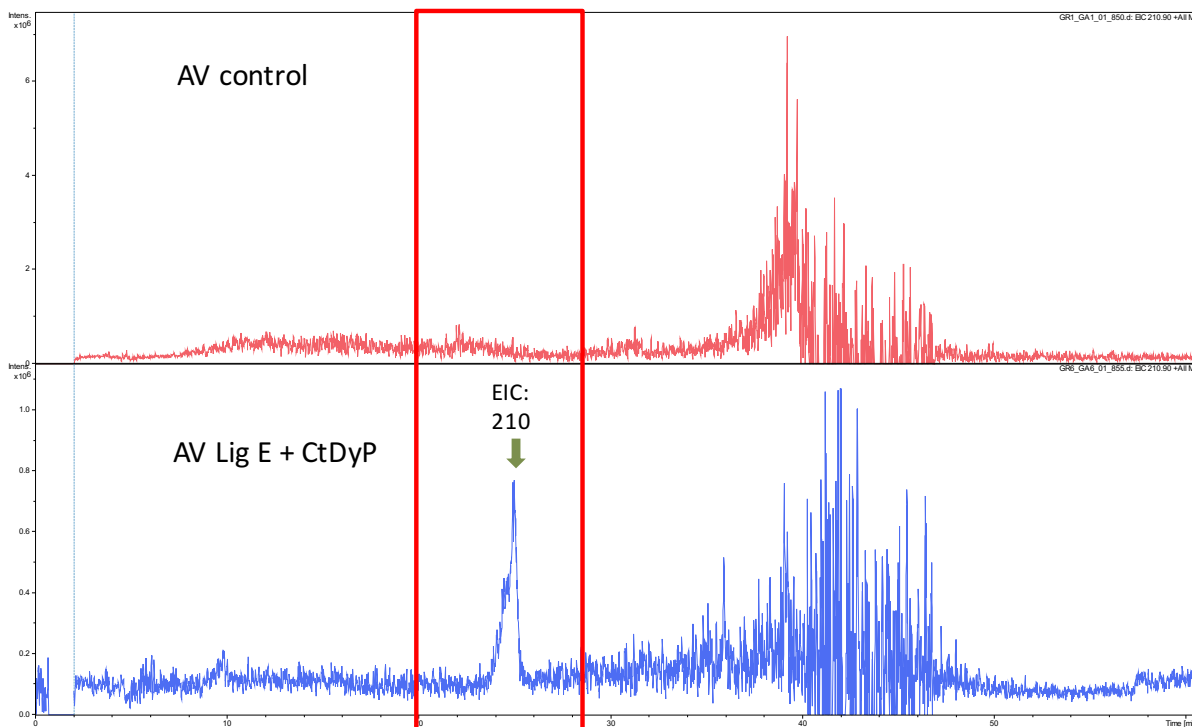

**Figure S26.** Incubation of AVL with Ct Dyp enzyme in the presence of LigE, extracted ion chromatogram for  $m/z$  210. Co-eluted with 1-(4-hydroxy-3-methoxyphenyl)-1-oxo-propan-3-ol, identified in previous study (ref 22).

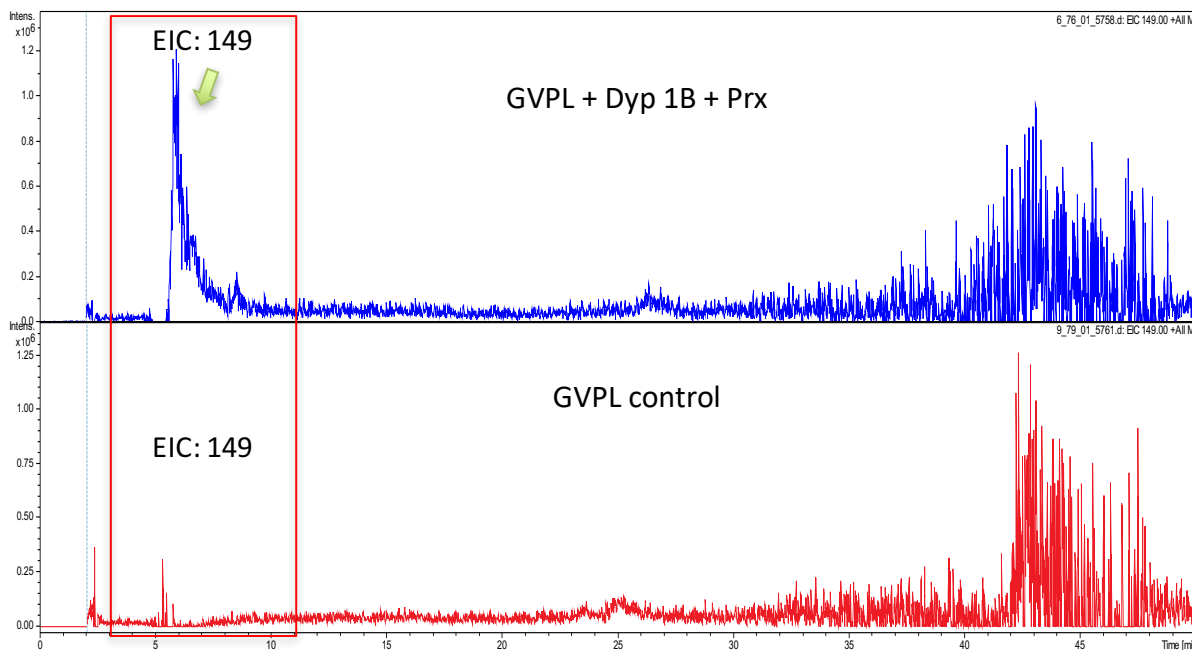

**Figure S27.** Incubation of GVPL with Dyp 1B enzyme in the presence of peroxiredoxin, extracted ion chromatogram for  $m/z$  149. Identified as 1-(4-hydroxyphenyl)ethanol ( $MH^+$  149) by comparison with commercial standard.



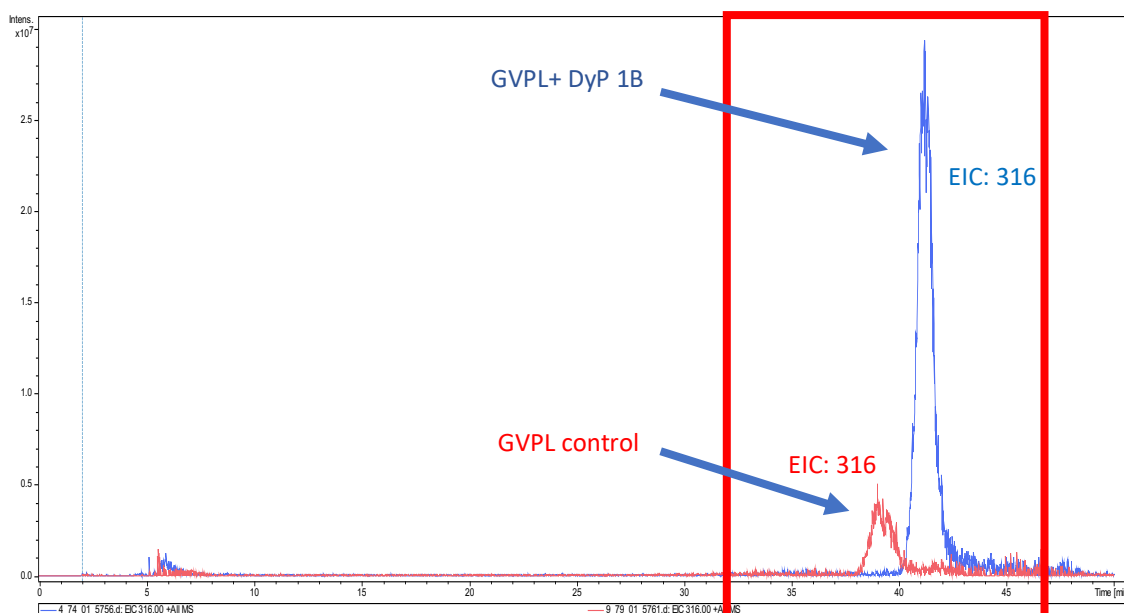

**Figure S28.** Incubation of GVPL with Dyp 1B enzyme, extracted ion chromatogram for  $m/z$  316. Probable oxidised lignin dimer (G,G units).

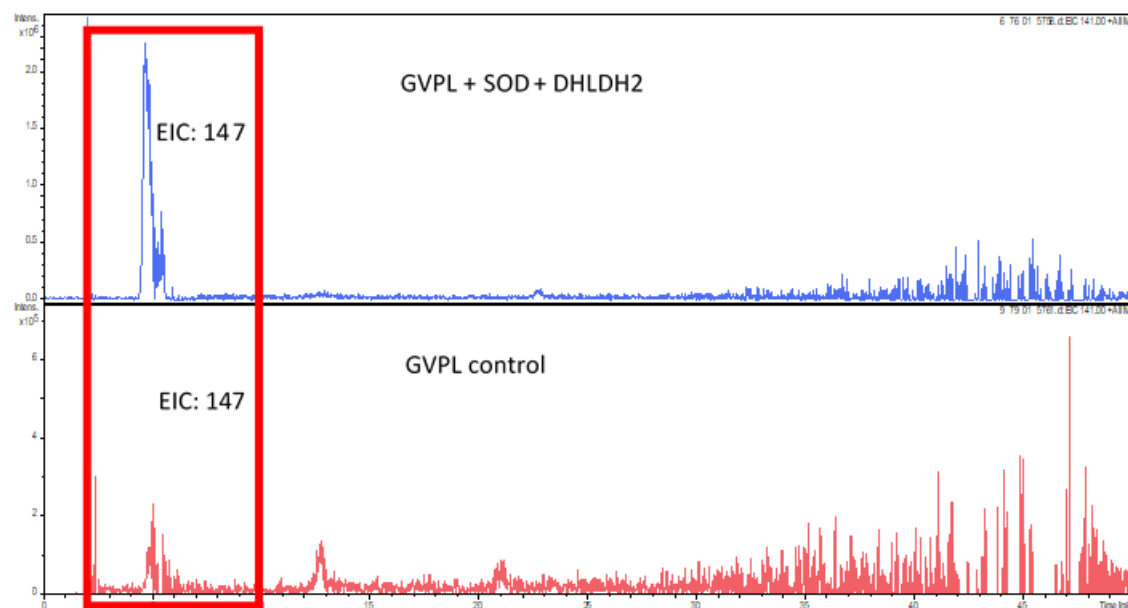

**Figure S29.** Incubation of GVPL with SOD enzyme in the presence of DHLDH2, extracted ion chromatogram for  $m/z$  147. Identified as (4-hydroxyphenyl)methylketone ( $MH^+$  147) by comparison with commercial standard.

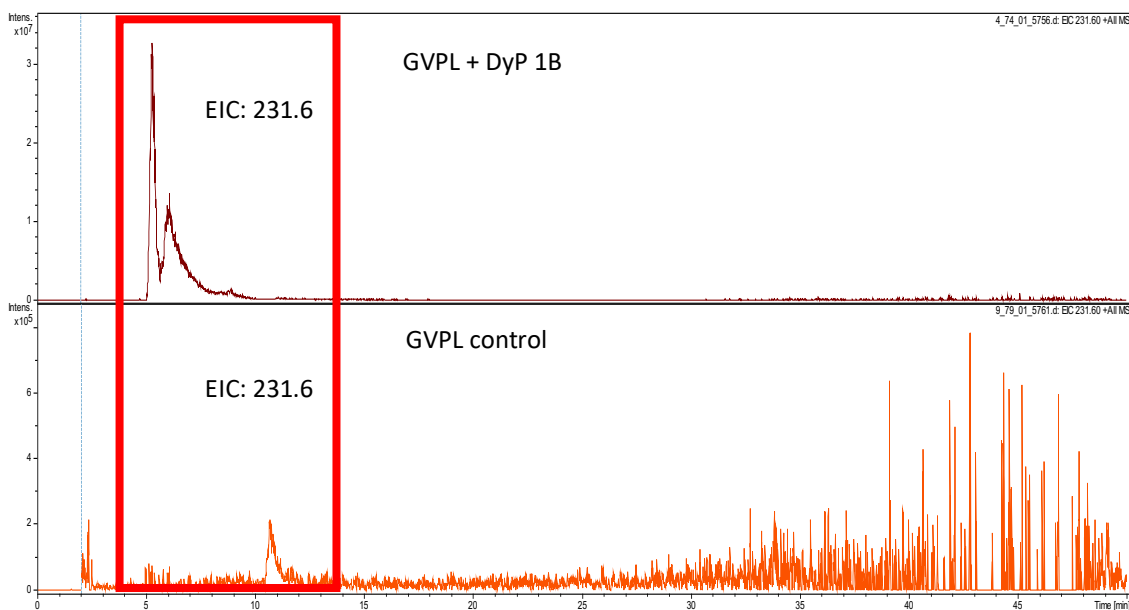

**Figure S30.** Incubation of GVPL with Dyp 1B enzyme, extracted ion chromatogram for  $m/z$  231.6.

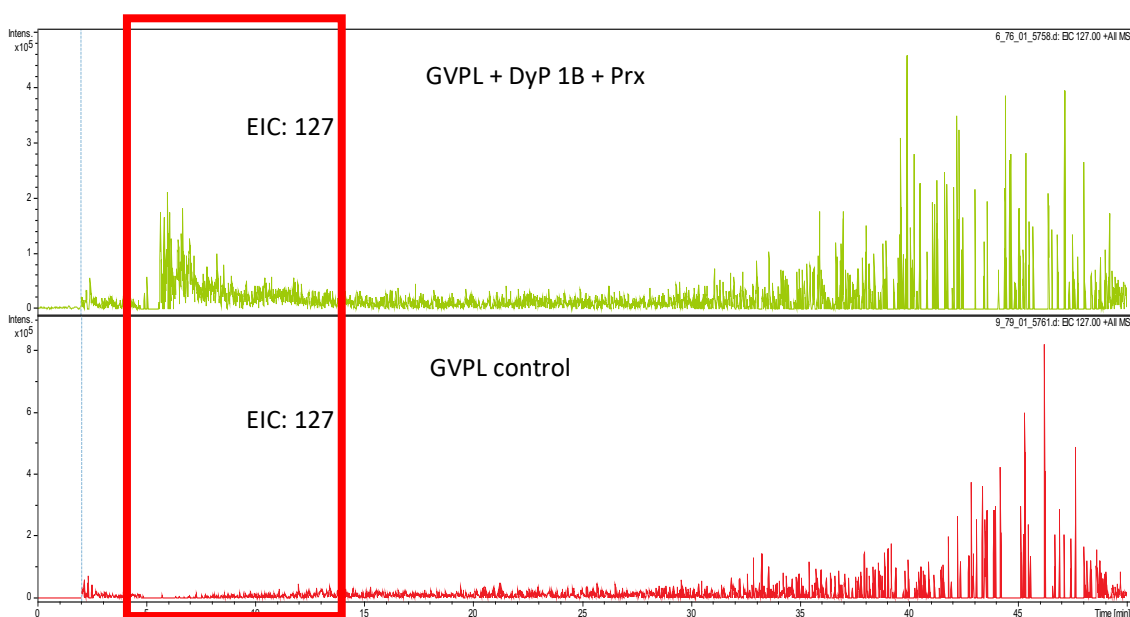

**Figure S31.** Incubation of GVPL with Dyp 1B enzyme in the presence of Peroxiredoxin, extracted ion chromatogram for  $m/z$  127. Identified as hydroxyquinol ( $MH^+$  127) by comparison with commercial standard.

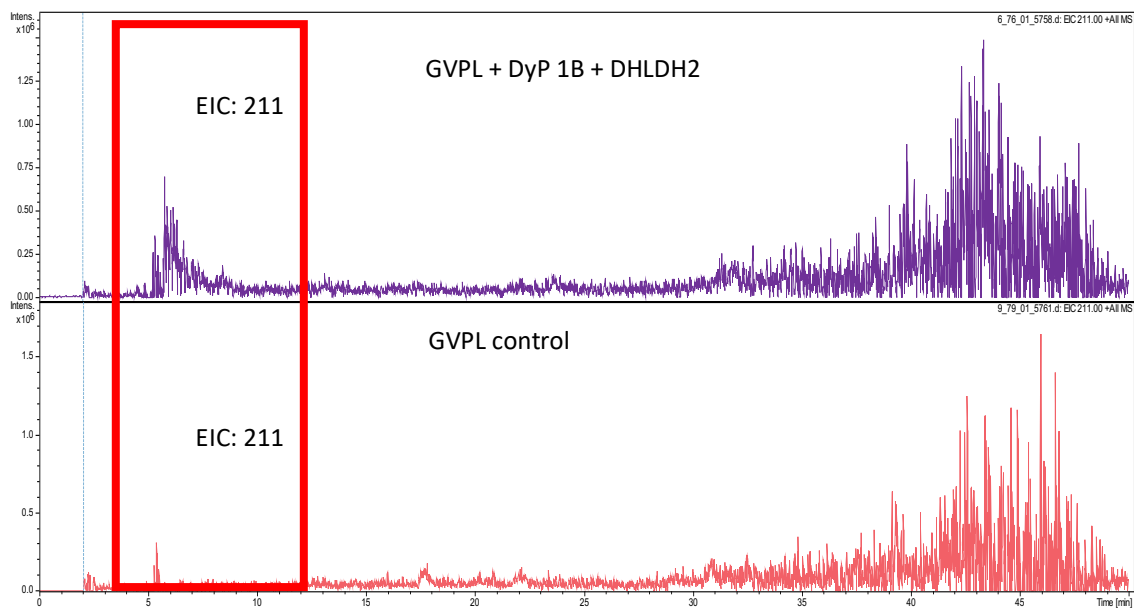

**Figure S32.** Incubation of GVPL with Dyp 1B enzyme in the presence of DHLDH2, extracted ion chromatogram for  $m/z$  211. Structure assigned as 4-hydroxy-3-methoxyphenyl-propanediol ( $MH^+$  211) by similar elution profile with 4-hydroxy-3-methoxyphenyl-propanetriol observed in previous study (ref 22).

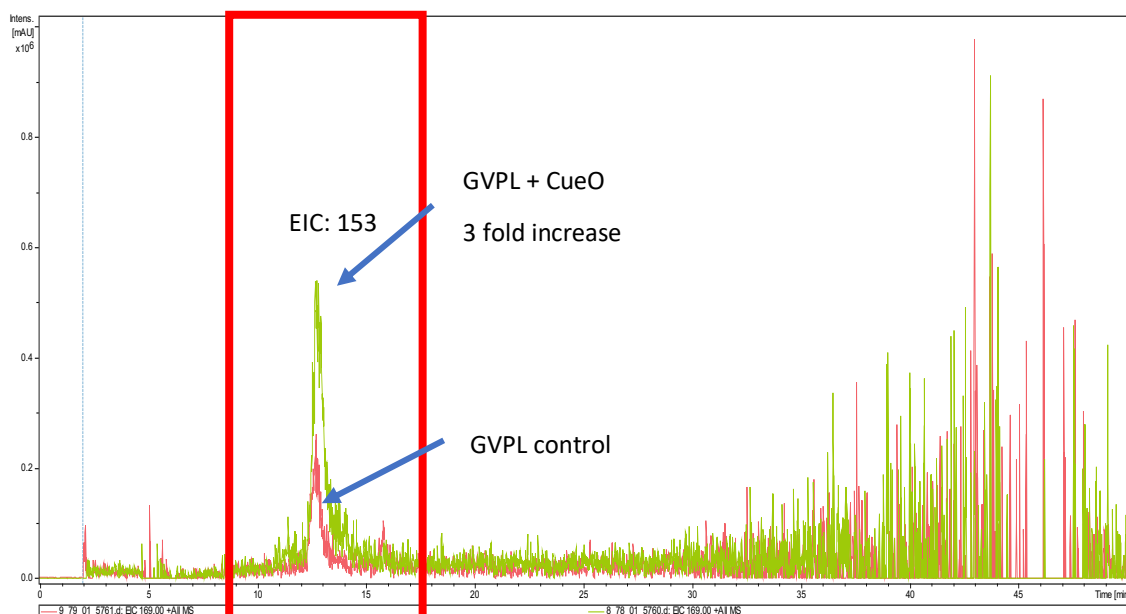

**Figure S33.** Incubation of GVPL with Dyp 1B enzyme, extracted ion chromatogram for  $m/z$  153. Identified as vanillin ( $MH^+$  153) by comparison with commercial standard.
